# Supplementary material for: Power calculation for detecting interaction effect in cross-sectional stepped-wedge cluster randomized trials: an important tool for disparity research
Source: BMC Med Res Methodol. 2024 Mar 2;24:57. doi: 10.1186/s12874-024-02162-0 (PMC11323530; doi:10.1186/s12874-024-02162-0)
Supplement: Supplementary file 1 — Additional file 1. APPENDIX. [file 12874_2024_2162_MOESM1_ESM.docx]

APPENDIX

Formulations for the empirical and model-based calculated variances for the OTE

Formulations for the empirical and model-based calculated variances for the HTE

where is estimated by GEE using the th simulated sample for ,

and

with .
